# Supplementary material for: Silencing CDK4 radiosensitizes breast cancer cells by promoting apoptosis
Source: PubMed Central journal article supplement (PMC3733890; doi:10.1186/1747-1028-8-10), 2013-07-25

**A**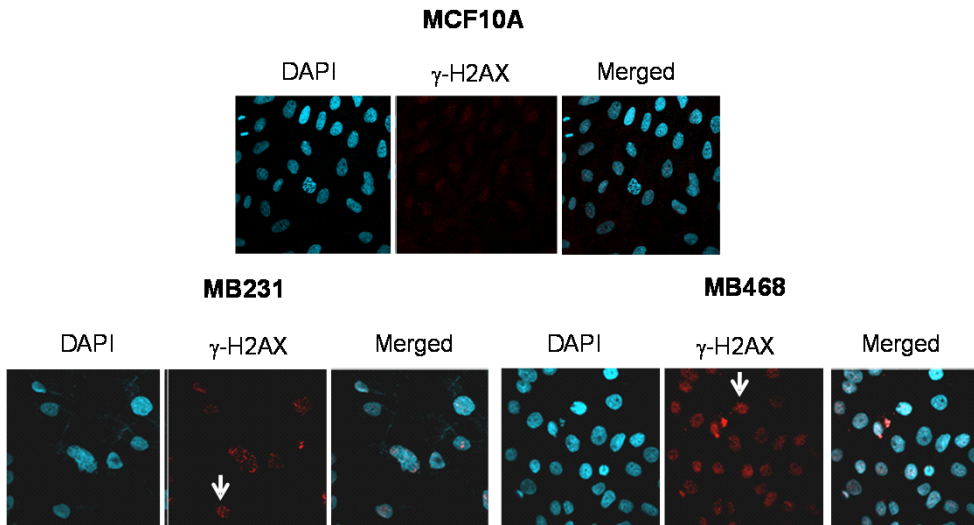**B**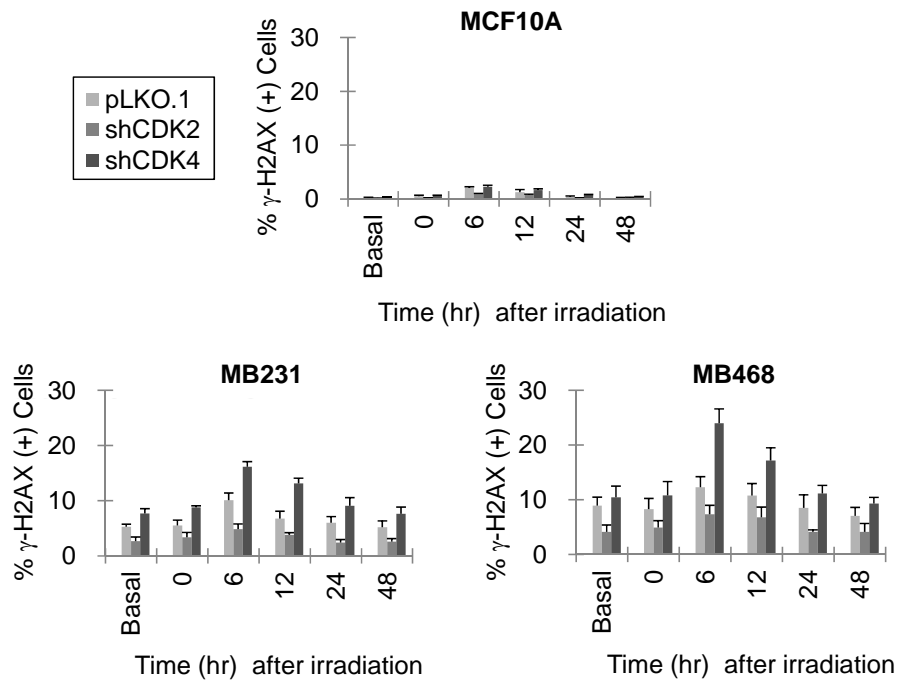

Supplement: 1747-1028-8-10-S2.pdf [file 1747-1028-8-10-S2.pdf]
