# Supplementary material for: Silencing CDK4 radiosensitizes breast cancer cells by promoting apoptosis
Source: PubMed Central journal article supplement (PMC3733890; doi:10.1186/1747-1028-8-10), 2013-07-25

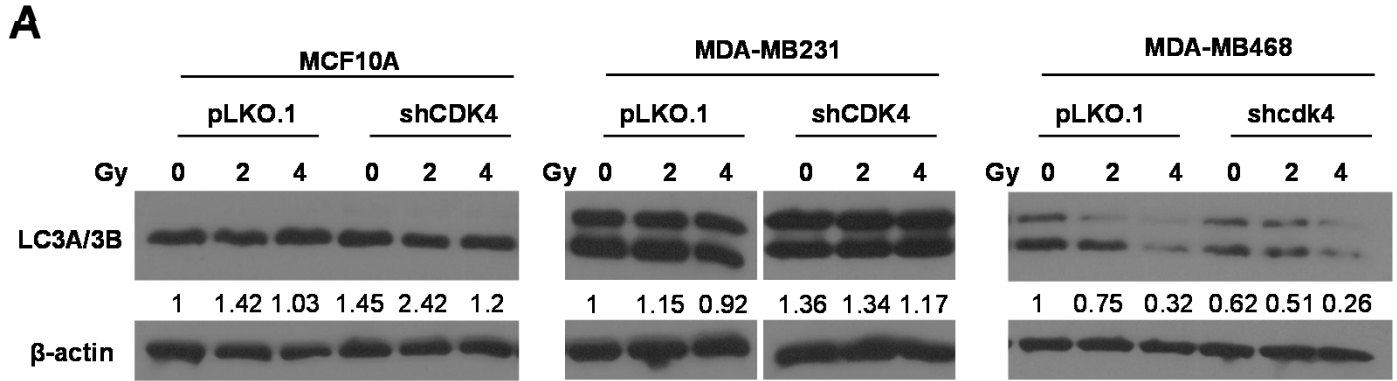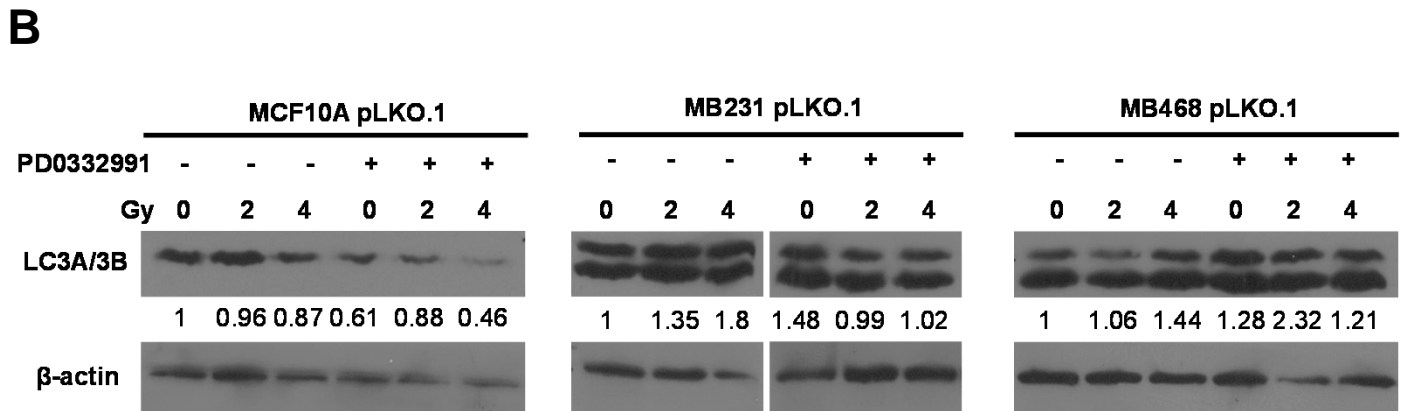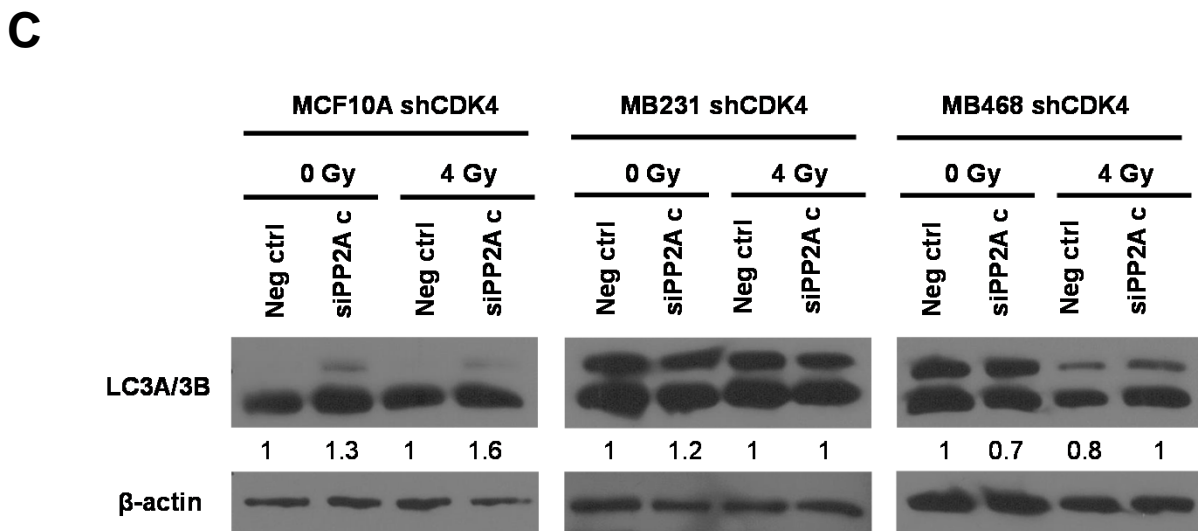

Supplement: 1747-1028-8-10-S4.pdf [file 1747-1028-8-10-S4.pdf]
